# Supplementary material
Source: publisher figshare collection journal article supplement (https://gsajournals.figshare.com/ndownloader/files/24973205)

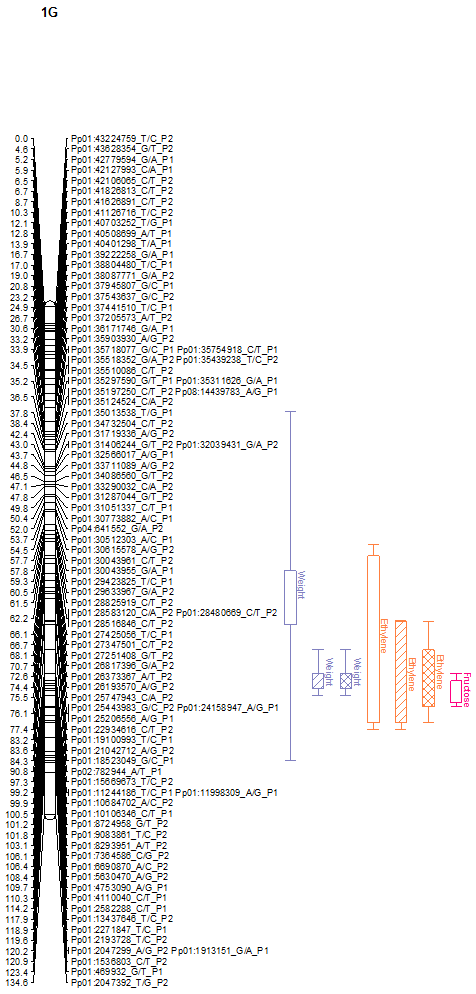

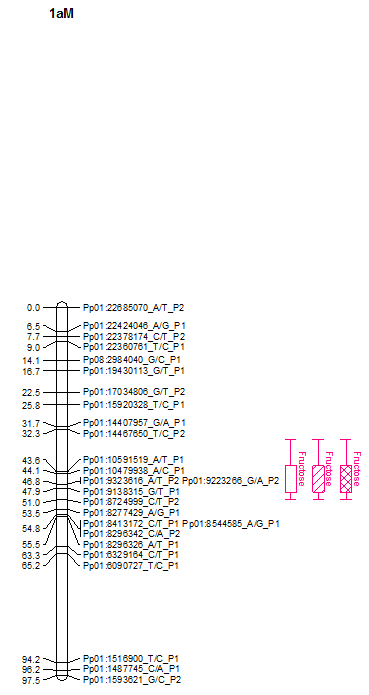

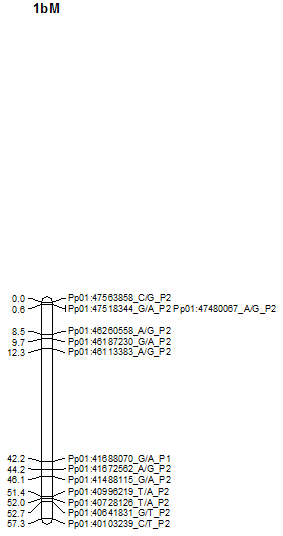


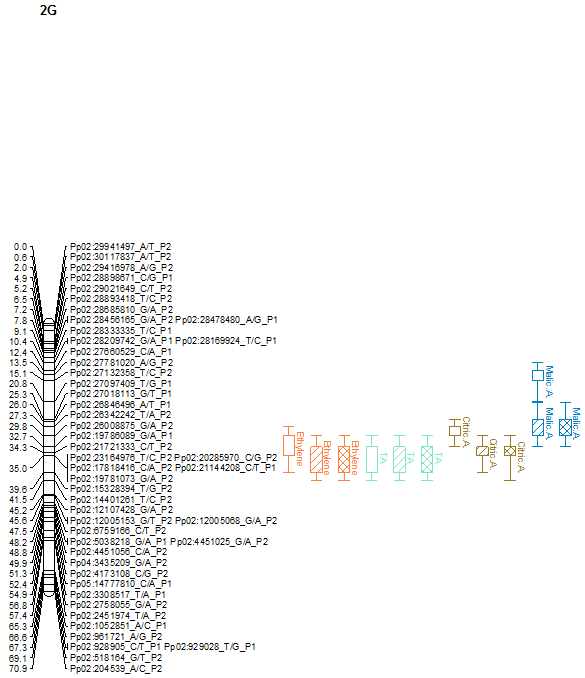

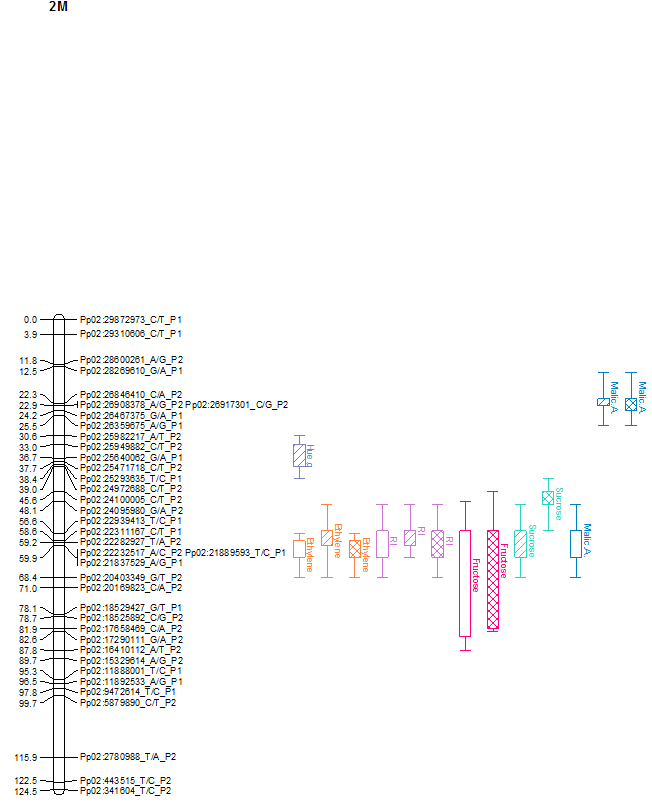


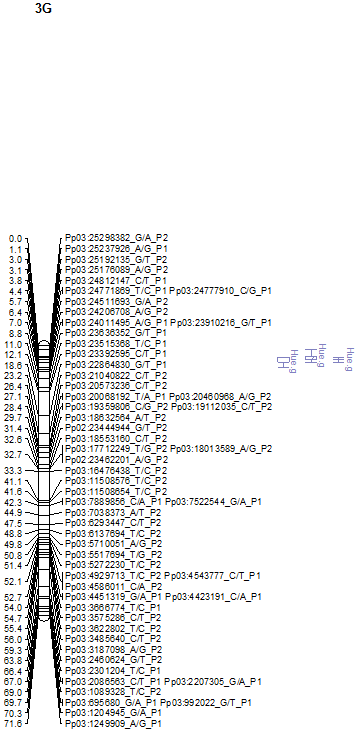

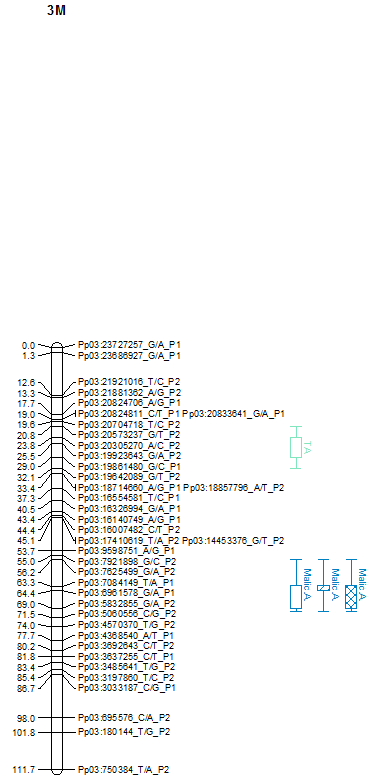


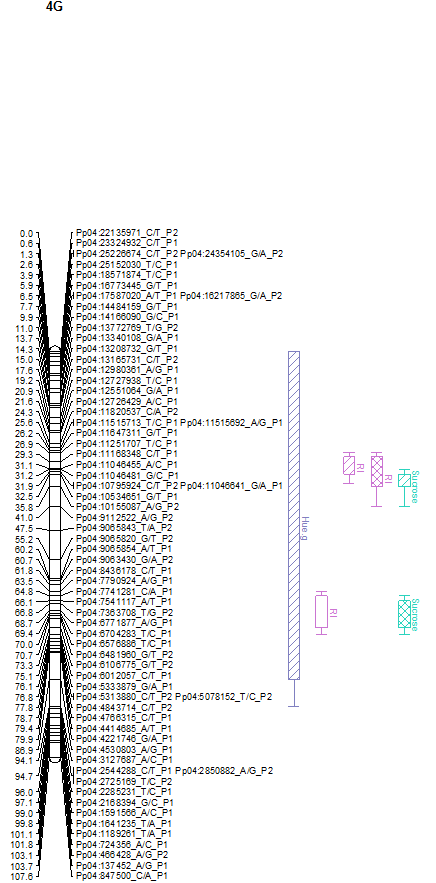

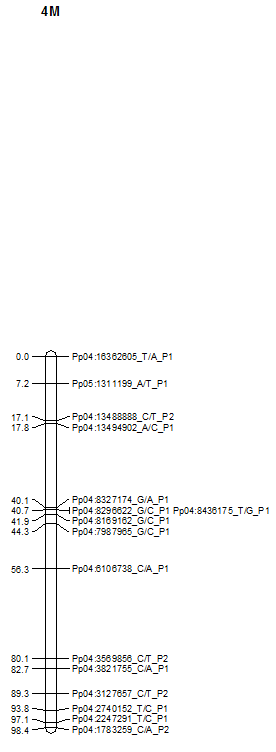


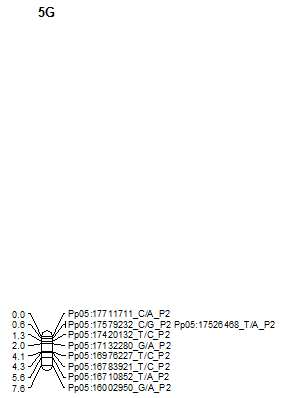

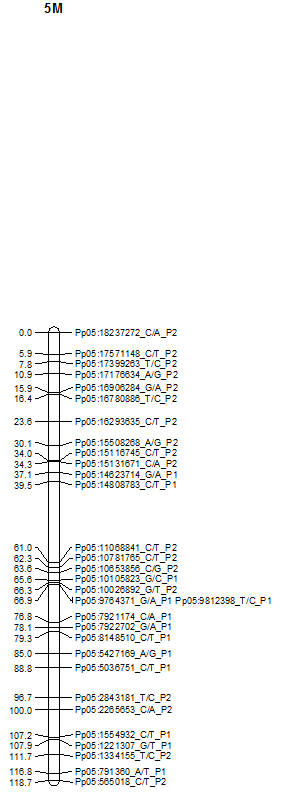


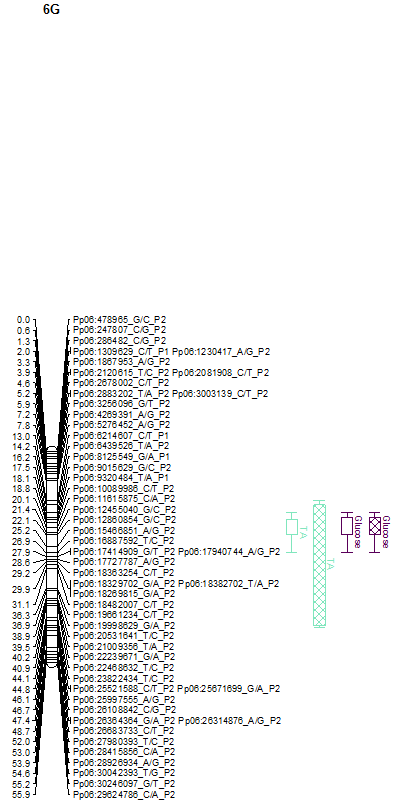

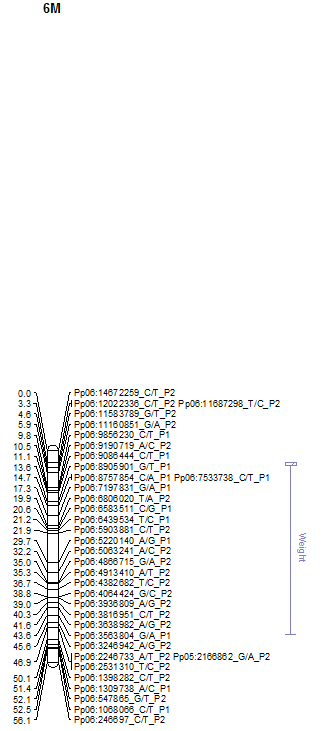


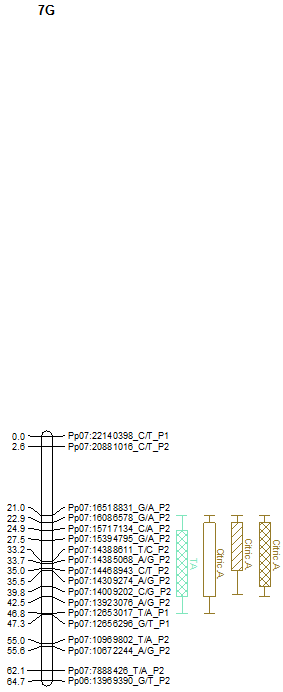

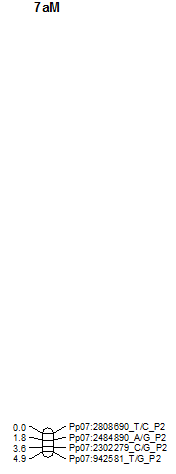

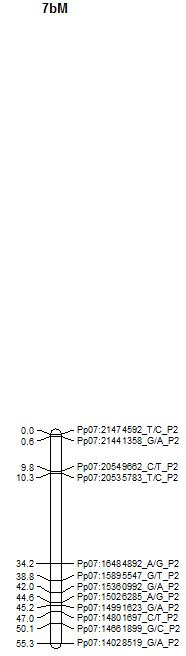


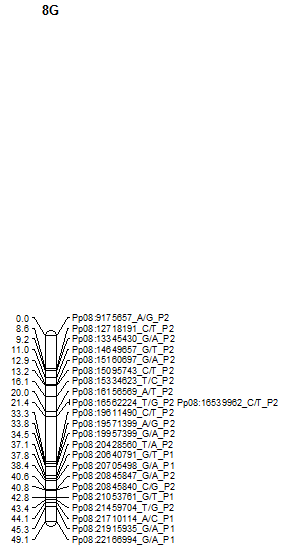

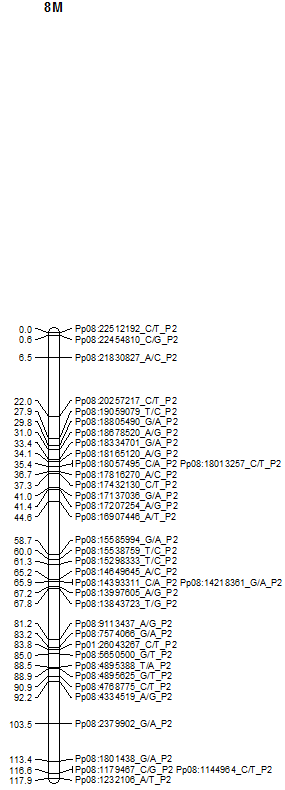

Supplement: Supplementary file 1 [file 24973205]
